# Supplementary material for: Optimization of Water Lentil (Duckweed) Leaf Protein Purification: Identification, Structure, and Foaming Properties
Source: MDPI journal article supplement (doi:10.3390/foods12183424), 2023-09-14
Supplement: s1 [file s1]

## Supplementary material

**Table S1:** Preliminary central Composite design for water lentil extraction by solubilization

| Trial | Input parameters                    |                     |     |
|-------|-------------------------------------|---------------------|-----|
|       | Concentration<br>( <i>w/w</i> in %) | Temperature<br>(°C) | pH  |
| 1     | 4                                   | 80                  | 8   |
| 2     | 4                                   | 50                  | 9.5 |
| 3     | 6                                   | 50                  | 9.5 |
| 4     | 6                                   | 50                  | 11  |
| 5     | 6                                   | 80                  | 9.5 |
| 6     | 4                                   | 20                  | 8   |
| 7     | 6                                   | 50                  | 9.5 |
| 8     | 8                                   | 80                  | 11  |
| 9     | 4                                   | 80                  | 11  |
| 10    | 8                                   | 20                  | 8   |
| 11    | 8                                   | 80                  | 8   |
| 12    | 8                                   | 20                  | 11  |
| 13    | 6                                   | 20                  | 9.5 |
| 14    | 4                                   | 20                  | 11  |
| 15    | 8                                   | 50                  | 9.5 |
| 16    | 6                                   | 50                  | 8   |

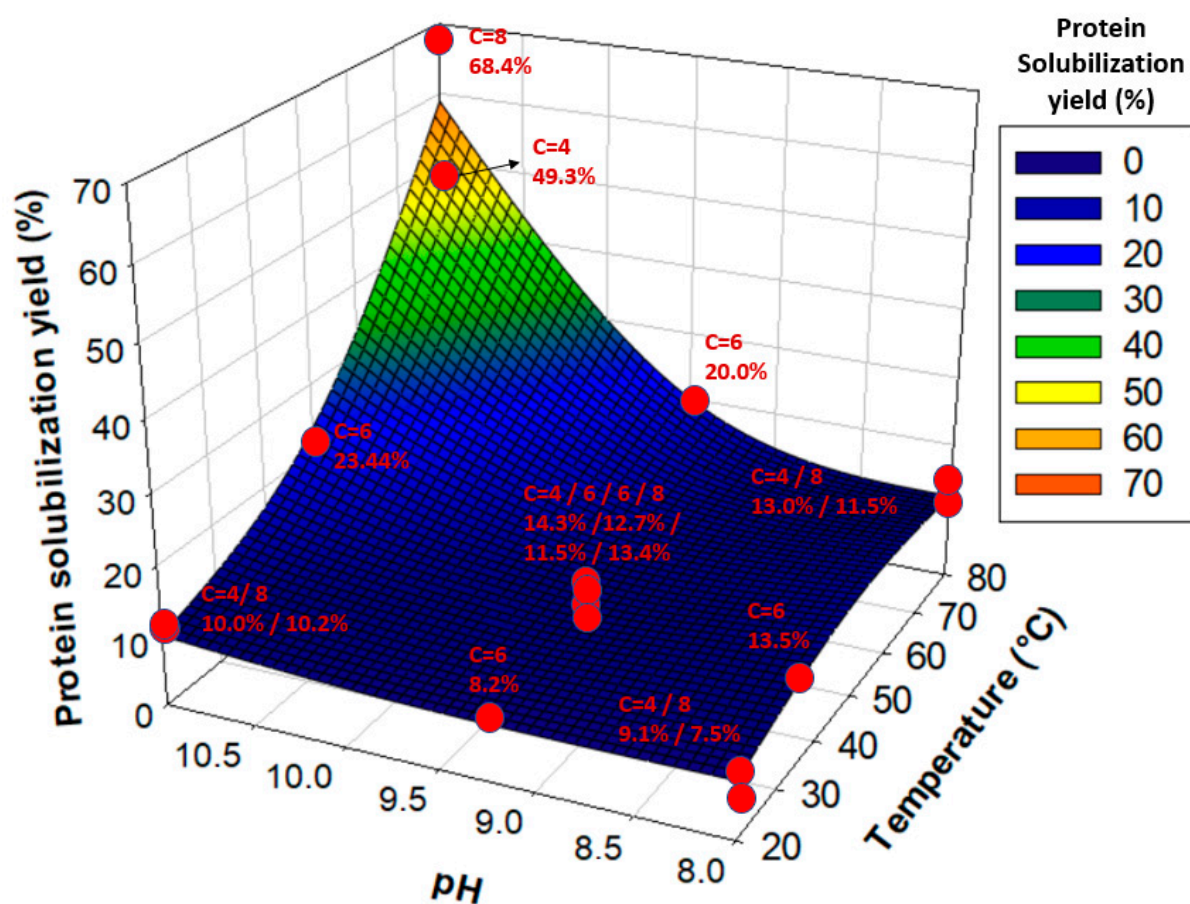

**Figure S1:** Protein solubilization yield (%) as a function of temperature and pH. Red dots represent each tested sample. "C" stands for Concentration for the preliminary tests. Yields are associated with their respective Concentration, pH and Temperature values and are given next to each red dot.



**Table S2:** Analyses of variance for the protein solubilization purity

| Input parameter             | DF | SS     | MS    | F-value | P-value |
|-----------------------------|----|--------|-------|---------|---------|
| Model                       | 9  | 154.1  | 17.1  | 0.85    | 0.60    |
| Concentration               | 1  | 65.79  | 65.79 | 3.28    | 0.12    |
| Temperature                 | 1  | 20.36  | 20.36 | 1.01    | 0.35    |
| pH                          | 1  | 2.61   | 2.61  | 0.13    | 0.73    |
| Concentration*Temperature   | 1  | 5.28   | 5.28  | 0.26    | 0.63    |
| Concentration*pH            | 1  | 16.19  | 16.19 | 0.81    | 0.40    |
| Temperature*pH              | 1  | 0.096  | 0.096 | 0.0048  | 0.95    |
| Concentration*Concentration | 1  | 17.29  | 17.29 | 0.86    | 0.39    |
| Temperature*Temperature     | 1  | 1.12   | 1.12  | 0.056   | 0.056   |
| pH*pH                       | 1  | 1.78   | 1.78  | 0.089   | 0.78    |
| Error                       | 6  | 120.38 | 20.06 |         |         |
| Total                       | 15 | 274.48 |       |         |         |

DF: Degree of freedom; SS: Sum of squares; MS: Mean of squares

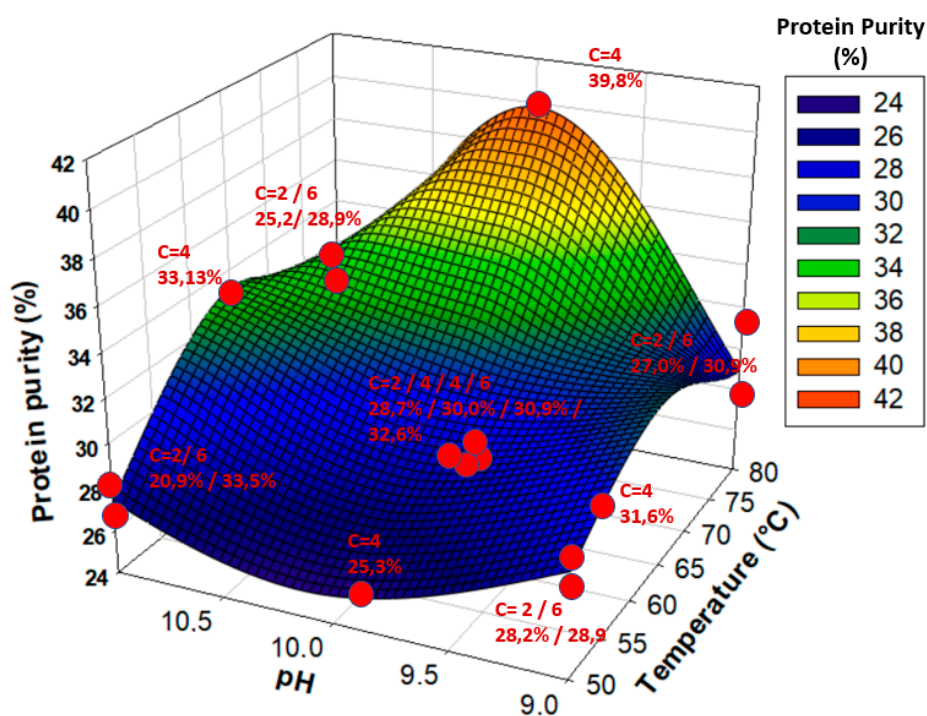

**Figure S3:** Protein purity as a function of temperature and pH. Red dots represent each tested sample. “C” stands for Concentration for the preliminary tests. Yields are associated with their respective Concentration, pH and Temperature values and are given next to each red dot.

**Table S3:** Analysis of variance of the full factorial design studying the effect of initial powder concentration and pH of precipitation on the total protein yield.

| Input parameter                             | DF | SS      | MS     | F-value | P-value       |
|---------------------------------------------|----|---------|--------|---------|---------------|
| <b>Model</b>                                | 19 | 2315.00 | 121.84 | 2.35    | <b>0.0064</b> |
| Concentration                               | 3  | 307.63  | 102.54 | 1.98    | 0.13          |
| Concentration (linear)                      | 1  | 138.06  | 138.06 | 2.66    | 0.1082        |
| Concentration (quadratic)                   | 1  | 51.84   | 51.84  | 1.00    | 0.3216        |
| Concentration (cubic)                       | 1  | 117.72  | 117.72 | 2.27    | 0.1373        |
| <b>pH</b>                                   | 4  | 1166.60 | 291.65 | 5.62    | <b>0.0007</b> |
| <b>pH (linear)</b>                          | 1  | 414.74  | 414.74 | 7.99    | <b>0.0064</b> |
| <b>pH (quadratic)</b>                       | 1  | 683.90  | 683.90 | 13.17   | <b>0.0006</b> |
| pH (cubic)                                  | 1  | 0.24    | 0.24   | 0.00    | 0.9460        |
| pH (residual)                               | 1  | 67.71   | 67.71  | 1.30    | 0.26          |
| Concentration * pH                          | 12 | 840.77  | 70.06  | 1.35    | 0.22          |
| <b>Concentration (linear) * pH (linear)</b> | 1  | 242.44  | 242.44 | 4.67    | <b>0.035</b>  |
| Concentration (linear) * pH (quadratic)     | 1  | 188.11  | 188.11 | 3.62    | 0.062         |
| Concentration (linear) * pH (cubic)         | 1  | 15.34   | 15.34  | 0.30    | 0.59          |
| Concentration (linear) * pH (residual)      | 1  | 170.80  | 170.80 | 3.62    | 0.0618        |
| Concentration (quadratic) * pH (linear)     | 1  | 11.56   | 11.56  | 0.22    | 0.64          |
| Concentration (quadratic) * pH (quadratic)  | 1  | 0.00    | 0.00   | 0.00    | 1.00          |
| Concentration (quadratic) * pH (residual)   | 1  | 141.15  | 141.15 | 2.72    | 0.10          |
| Concentration (cubic) * pH (linear)         | 1  | 40.59   | 40.59  | 0.78    | 0.38          |
| Concentration (cubic) * pH (quadratic)      | 1  | 2.80    | 2.80   | 0.05    | 0.82          |
| Concentration (cubic) * pH (cubic)          | 1  | 3.73    | 3.73   | 0.07    | 0.79          |
| Concentration (cubic) * pH (residual)       | 1  | 7.36    | 7.36   | 0.14    | 0.71          |
| Error                                       | 60 | 3114.59 | 51.91  |         |               |
| Total                                       | 79 | 5429.59 |        |         |               |

DF: Degree of freedom; SS: Sum of squares; MS: Mean of squares

In bold ; statistically significant effect at  $p$ -Value < 0.05 level

**Table S4:** Analysis of variance of the full factorial design studying the effect of initial powder concentration and pH of precipitation on the total protein purity.

| Input parameter                            | DF | SS      | MS     | F-value | P-value            |
|--------------------------------------------|----|---------|--------|---------|--------------------|
| <b>Model</b>                               | 19 | 780.70  | 41.09  | 2.20    | <b>0.011</b>       |
| <b>Concentration</b>                       | 3  | 524.47  | 174.82 | 9.35    | <b>&lt;0.00010</b> |
| <b>Concentration (linear)</b>              | 1  | 369.22  | 369.22 | 19.74   | <b>&lt;0.00010</b> |
| Concentration (quadratic)                  | 1  | 35.25   | 35.25  | 1.88    | 0.1749             |
| <b>Concentration (cubic)</b>               | 1  | 120.01  | 120.01 | 6.42    | <b>0.014</b>       |
| pH                                         | 4  | 46.96   | 11.74  | 0.63    | 0.64               |
| pH (linear)                                | 1  | 0.085   | 0.085  | 0.00    | 0.95               |
| pH (quadratic)                             | 1  | 13.36   | 13.36  | 0.71    | 0.40               |
| pH (cubic)                                 | 1  | 32.49   | 32.49  | 1.74    | 0.19               |
| pH (residual)                              | 1  | 1.02    | 1.02   | 0.05    | 0.82               |
| Concentration * pH                         | 12 | 209.26  | 17.44  | 0.93    | 0.52               |
| Concentration (linear) * pH (linear)       | 1  | 40.91   | 40.91  | 2.19    | 0.14               |
| Concentration (linear) * pH (quadratic)    | 1  | 22.26   | 22.26  | 1.19    | 0.28               |
| Concentration (linear) * pH (cubic)        | 1  | 14.93   | 14.93  | 0.80    | 0.38               |
| Concentration (linear) * pH (residual)     | 1  | 1.80    | 1.80   | 0.10    | 0.76               |
| Concentration (quadratic) * pH (linear)    | 1  | 42.54   | 45.24  | 2.27    | 0.14               |
| Concentration (quadratic) * pH (quadratic) | 1  | 23.86   | 23.86  | 1.28    | 0.26               |
| Concentration (quadratic) * pH (residual)  | 1  | 3.44    | 3.44   | 0.18    | 0.67               |
| Concentration (cubic) * pH (linear)        | 1  | 30.93   | 30.93  | 1.65    | 0.20               |
| Concentration (cubic) * pH (quadratic)     | 1  | 21.8    | 21.8   | 1.17    | 0.28               |
| Concentration (cubic) * pH (cubic)         | 1  | 3.39    | 3.39   | 0.18    | 0.67               |
| Concentration (cubic) * pH (residual)      | 1  | 1.48    | 1.48   | 0.08    | 0.78               |
| Error                                      | 60 | 1122.03 | 41.09  |         |                    |
| Total                                      | 79 | 1902.7  |        |         |                    |

DF: Degree of freedom; SS: Sum of squares; MS: Mean of squares

In bold ; statistically significant effect at  $p$ -Value < 0.05 level

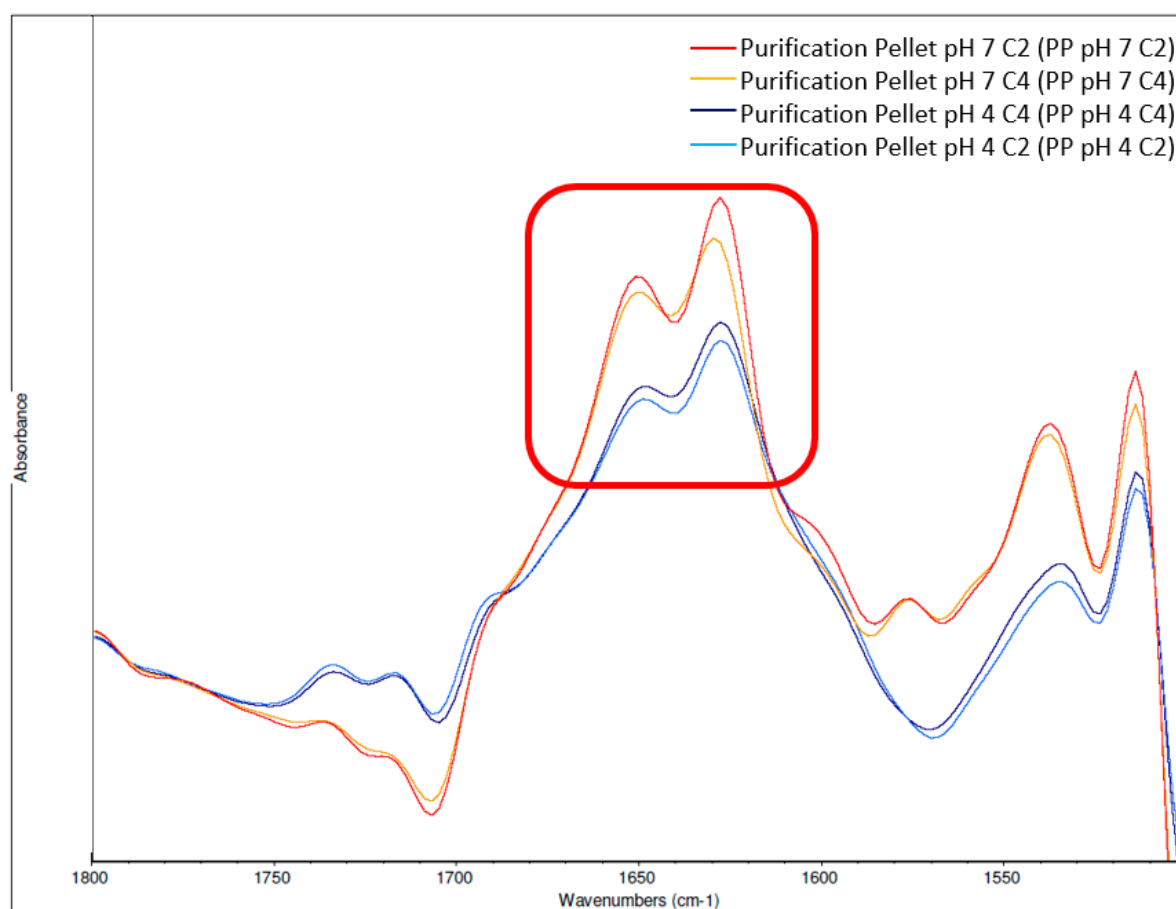

**Figure S4:** Fourier self-deconvoluted FTIR-ATR spectra zoomed in the 1800 cm<sup>-1</sup> and 1500 cm<sup>-1</sup> region of sample at pH 4 and pH 7 of the purification pellet (PP) and purification supernatant (PS) obtained from an initial powder concentration of 2% and 4% (C2 and C4 respectively).

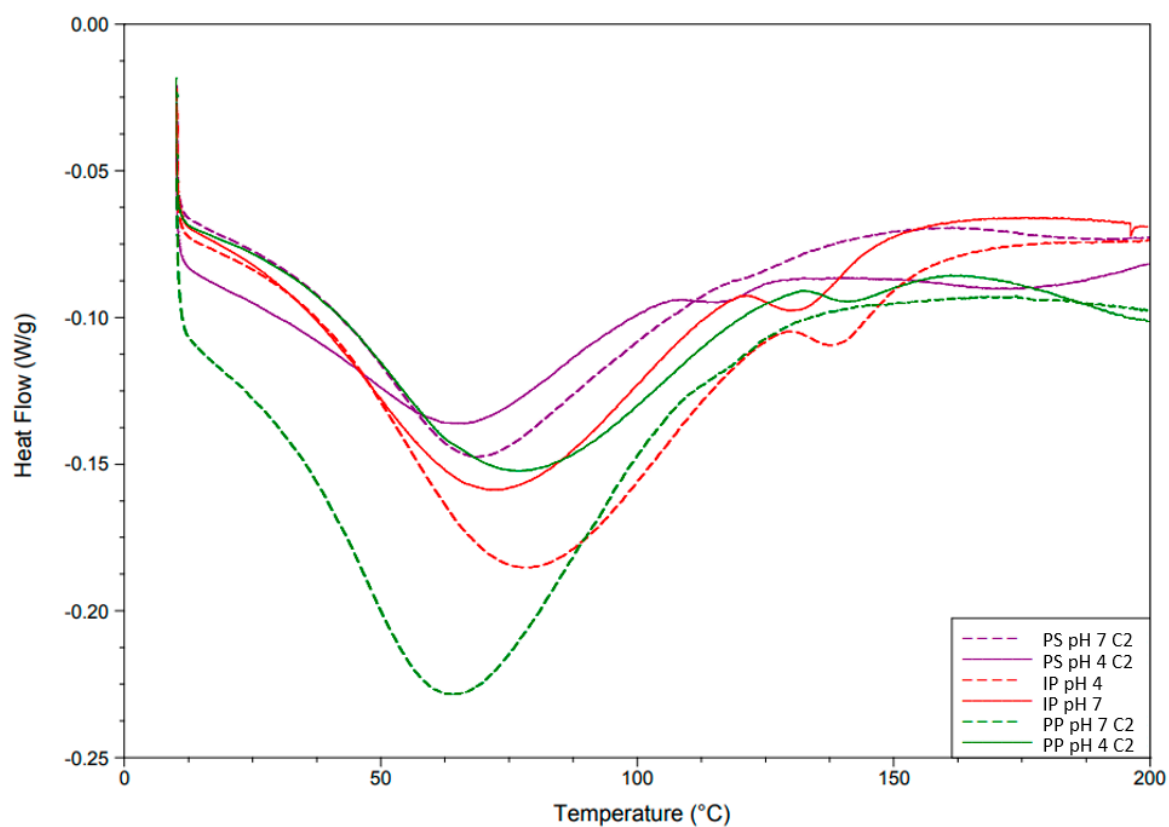

**Figure S5:** Representative Differential Scanning Calorimetry profiles of sample at pH 4 and pH 7 of the initial powder (IP), purification pellet (PP) and purification supernatant (PS) obtained from an initial powder concentration of 2% (C2). The curve areas were not normalized by protein concentration.
